# Supplementary material
Source: PubMed Central journal article supplement (PMC4333066)
Supplement: NIHMS645119-supplement-1.pdf [file NIHMS645119-supplement-1.pdf]

## Supplementary Information

### Modular construction of mammalian gene circuits using TALE transcriptional repressors

Yinqing Li<sup>1,6</sup>, Yun Jiang<sup>2,6</sup>, He Chen<sup>2,6</sup>, Weixi Liao<sup>2,3</sup>, Zhihua Li<sup>4</sup>, Ron Weiss<sup>1,5,\*</sup> and Zhen Xie<sup>2,3,\*</sup>

<sup>1</sup>Department of Electrical Engineering and Computer Science, Massachusetts Institute of Technology, 40 Ames St, Cambridge MA 02142, USA

<sup>2</sup>Bioinformatics Division/Center for Synthetic & Systems Biology, Tsinghua National Laboratory for Information Science and Technology, Tsinghua University, Beijing, 100084, China

<sup>3</sup>MOE Key Laboratory of Bioinformatics; Department of Automation, Tsinghua University, Beijing 100084, China

<sup>4</sup>Institute of Medical Biology, Chinese Academy of Medical Sciences and Peking Union Medical College, 935 Jiaoling Road, Kunming, Yunnan, 650118.

<sup>5</sup>Department of Biological Engineering, Massachusetts Institute of Technology, 40 Ames St, Cambridge MA 02142, USA

<sup>6</sup>These authors contribute equally to this work

\* To whom correspondence should be addressed: E-mail: [zhenxie@tsinghua.edu.cn](mailto:zhenxie@tsinghua.edu.cn) (Z.X.) or [rweiss@mit.edu](mailto:rweiss@mit.edu) (R.W.).

## Supplementary Results

### List of abbreviations

FACS: fluorescence activated cell sorting

EYFP: enhanced yellow fluorescent protein

mKate2: red fluorescent protein

iRFP: near-infrared fluorescent protein

EBFP2: enhanced blue fluorescent protein

TagBFP: monomeric blue fluorescent protein

CMV: cytomegalovirus immediate-early enhancer

hEF1 $\alpha$ : human elongation factor 1 $\alpha$  promoter

CAG: hybrid promoter combining CMV-IE promoter, chicken  $\beta$ -actin promoter, 5' flanking sequence and the first intron sequence with a modified splice acceptor sequence derived from the rabbit  $\beta$ -globin gene

TRE: tetracycline responsive element

rtTA: reverse tetracycline-controlled transactivator

Bla: Blasticidin resistance gene (blasticidin-S deaminase)

Gal4VP16: transcriptional activator that activates expression downstream of UAS sequence

2A: self-cleaving 2A peptides

NOS: transcription terminator derived from nopaline synthase gene from *Agrobacterium tumefaciens*

DMEM: Dulbecco's modified Eagle's medium

FBS: fetal bovine serum

HeLa: a cervical cancer cell line derived from cells taken from Henrietta Lacks

HEK293: human embryonic kidney 293 cell line

## Supplementary Figures

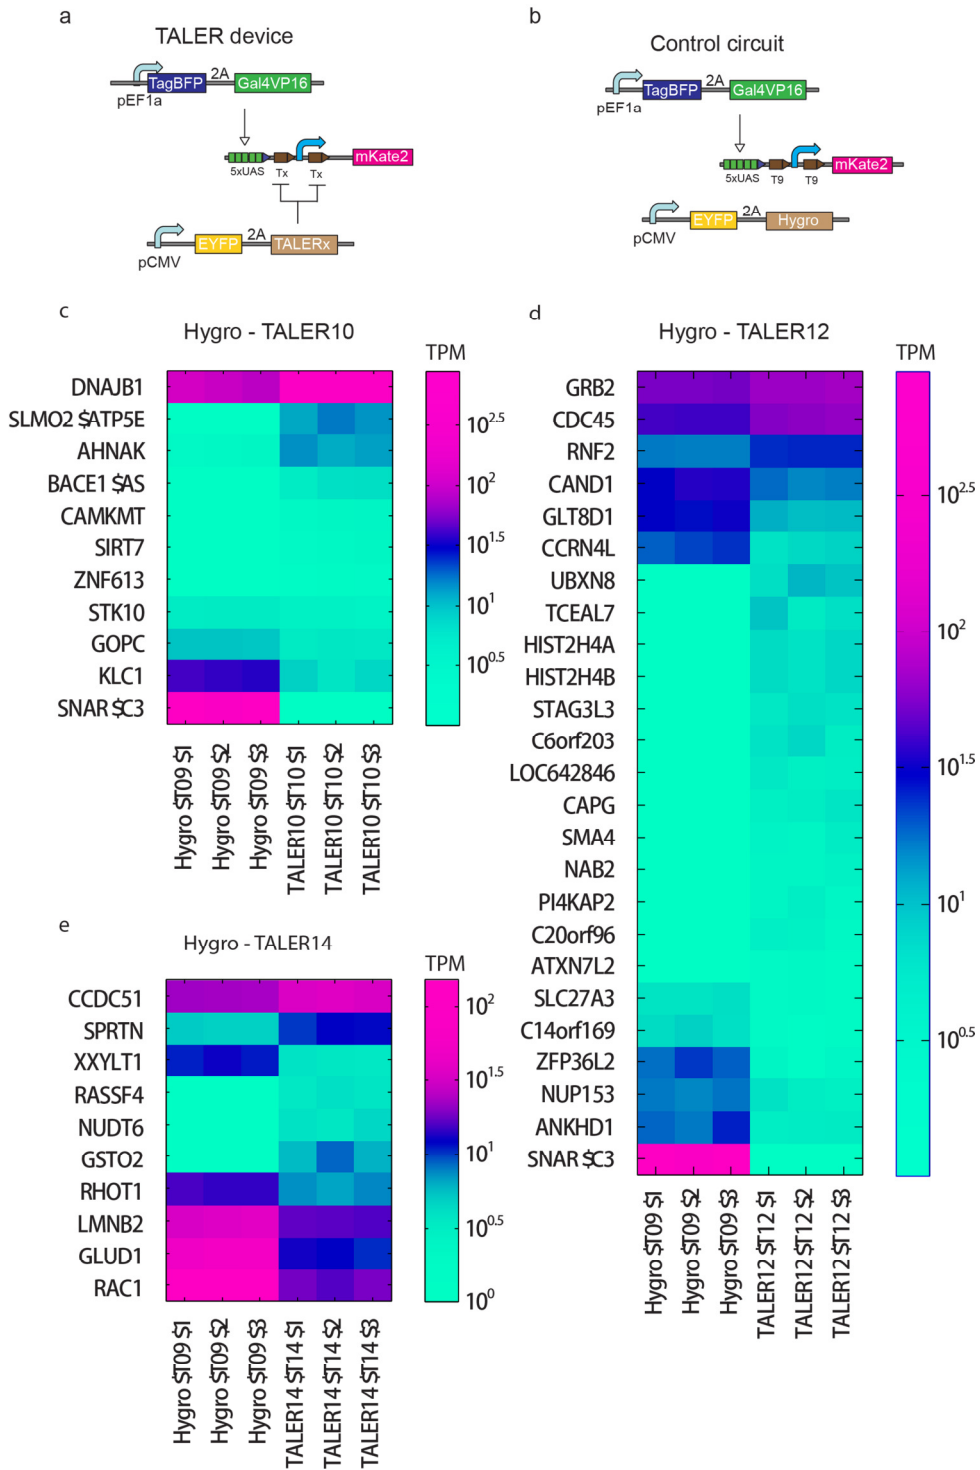

**Supplementary Figure 1.** RNA sequencing analysis of HEK293 cells transfected with TALER devices.

(a) Design of a TALER device used in RNA sequencing (RNA-seq). Tx: binding site for TALER x. Blue arrow represents a minimal CMV promoter. Lines with arrows indicate up-regulation and lines with bars indicate down-regulation. (b) Design of a control circuit used in RNA-seq. Hygro: hygromycin resistance gene. (c) - (e), On average, 9043 genes per sample were detected in the RNA-seq after filtering. Heat-maps show transcripts per million (TPM) of genes found differentially expressed when comparing RNA-seq results of control circuit to that of (c) TALER10 device, (d) TALER12 device, (e) TALER14 device. No differentially expressed genes were found for TALER9 device or TALER21 device. Row labels show name of differentially expressed genes and column labels show name of circuits transfected in each sample. Hygro-T09-1, -2, -3 represents three biological replicates transfected with the control circuit. TALERx-Tx-1, -2, -3 represents three biological replicates transfected with the TALERx ( $x = 10, 12$  or  $14$ ) device.

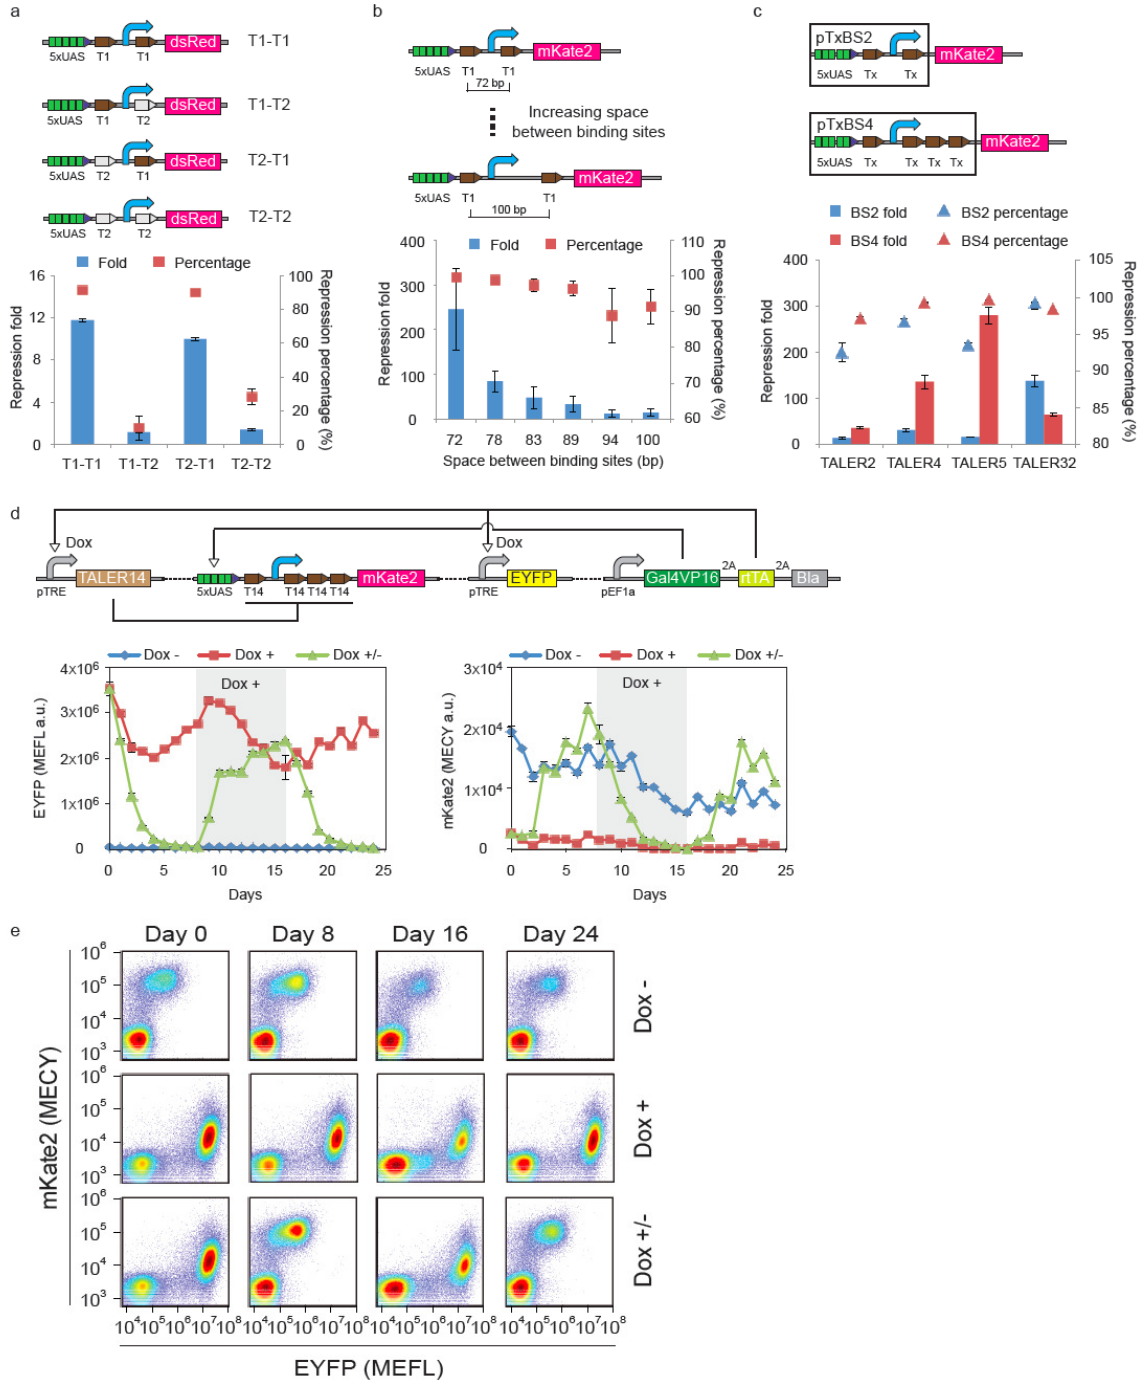

**Supplementary Figure 2.** Optimization of TALER promoter and TALER dynamics.

(a) TALER1 repression on variant promoters with T1 binding sites or T2 binding sites that serve as mock sequences. (b) TALER1 repression on variant promoters with indicated distances between upstream and downstream binding sites. (c) TALER repression on promoters with two (pTxBS2) or four binding sites (pTxBS4). (d) and (e) Dynamics of TALER in an engineered stable cell line. (d) Schematic representation of a

TALER circuit integrated into the genome of HEK293 cells. Lines with arrows indicate up regulation and lines with bars indicate down regulation. Shaded region labeled with Dox+ represents the time window of 1  $\mu\text{g}/\text{mL}$  Doxycycline in culture media for the treatment labeled with Dox+/- . Treatments labeled with Dox+ and Dox- represent cell populations with and without 1  $\mu\text{g}/\text{mL}$  Doxycycline in culture media respectively during the time course of the experiment. (e) Representative beads normalized EYFP and mKate2 scatter plots are shown at indicated day with (+) or without (-) or alternatively adding or removing (+/-) 1  $\mu\text{g}/\text{mL}$  doxycycline during the course of experiments. (a) to (d) Transfection configuration is described in Supplementary Table 2. Each data point shows mean  $\pm$  SD from three independent flow cytometry experiments.

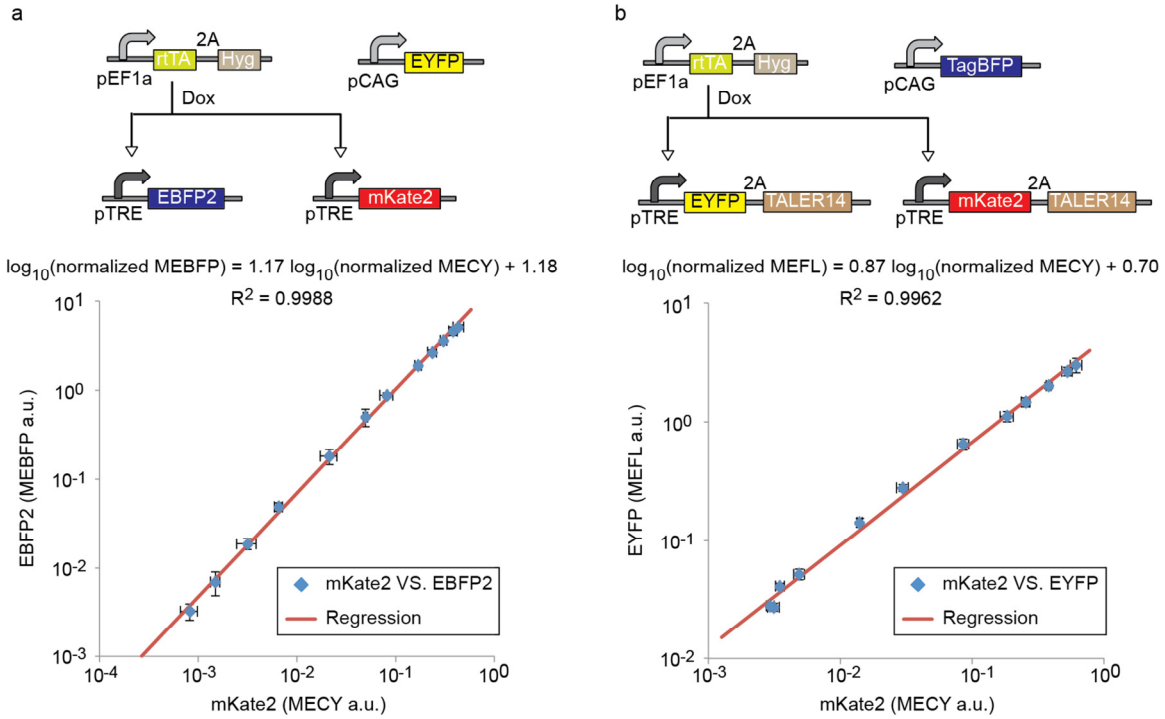

**Supplementary Figure 3.** Standardization of mKate2, EYFP, and EBFP2 channels

(a) Diagram of circuit used to establish EBFP2 and mKate2 conversion model. Correlation between beads normalized EBFP2 and mKate2 is shown in the bottom panel. Equation for linear regression is indicated above the correlation plot. (b) Diagram of circuit used in standardizing EYFP and mKate2 fused to TALER with a self-cleaving 2A linker. Correlation between beads standardized EYFP and mKate2 is shown in the bottom panel. Equation for linear regression is indicated above the correlation plot.

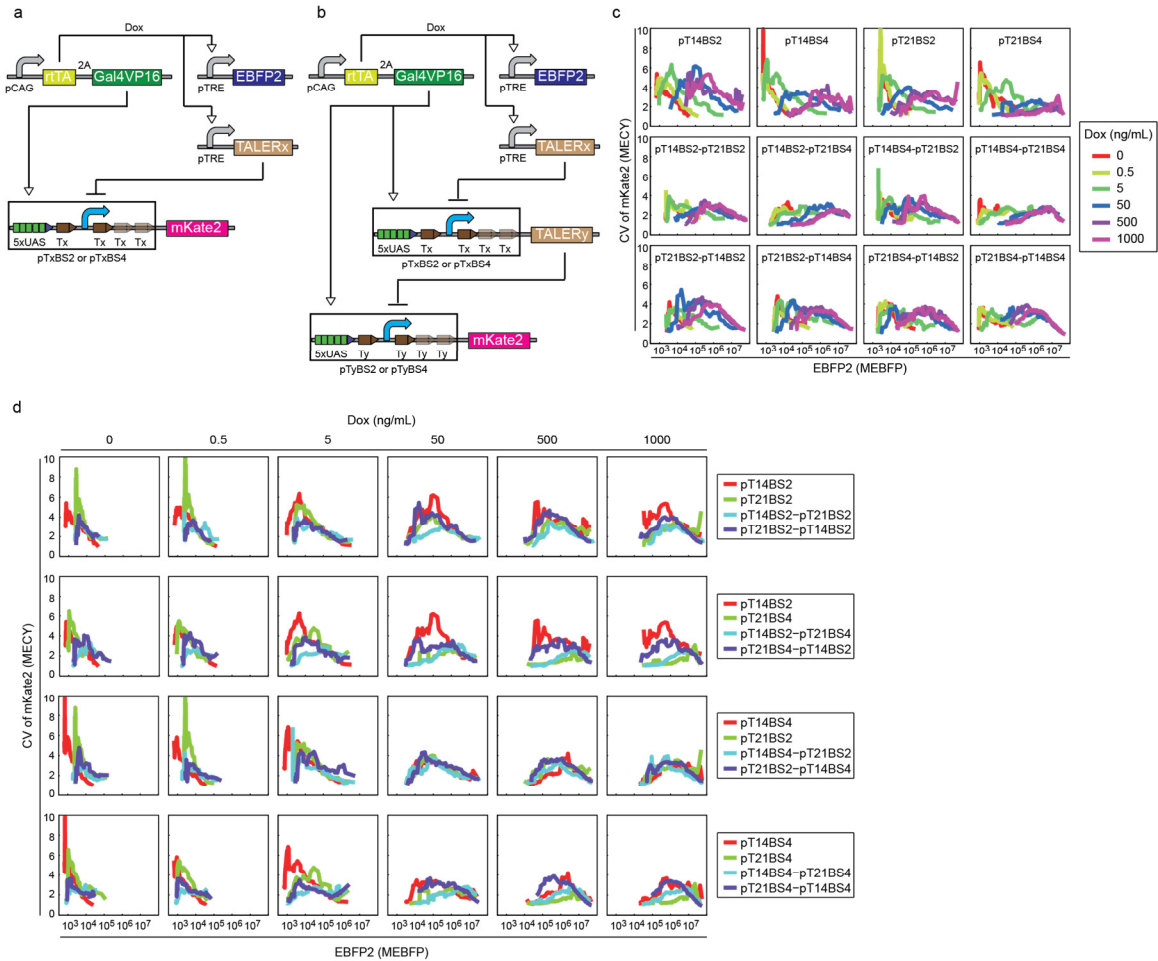

**Supplementary Figure 4.** Variance analysis of TALER devices and cascade circuits.

(a) Schematic representation of TALER devices. pTxBS2 and pTxBS4 are TALER promoters with two binding sites or four binding sites, respectively. (b) Schematic representation of TALER cascade circuit. For simplicity, pTxBS2 and pTxBS4 are depicted in the same diagram with two downstream binding sites in pTxBS4 promoter colored with reduced intensity. (c) and (d) Distributions of CV of individual TALER devices and cascades across the input range. For simplicity, six of fourteen tested Doxycycline concentrations are showed on the top of each panel. (c) Plots in the first row show the results of individual TALERs, and plots in the second and the third rows show the results of TALER cascades. (d) Plots in different rows indicate different TALER cascade and the corresponding constituents.



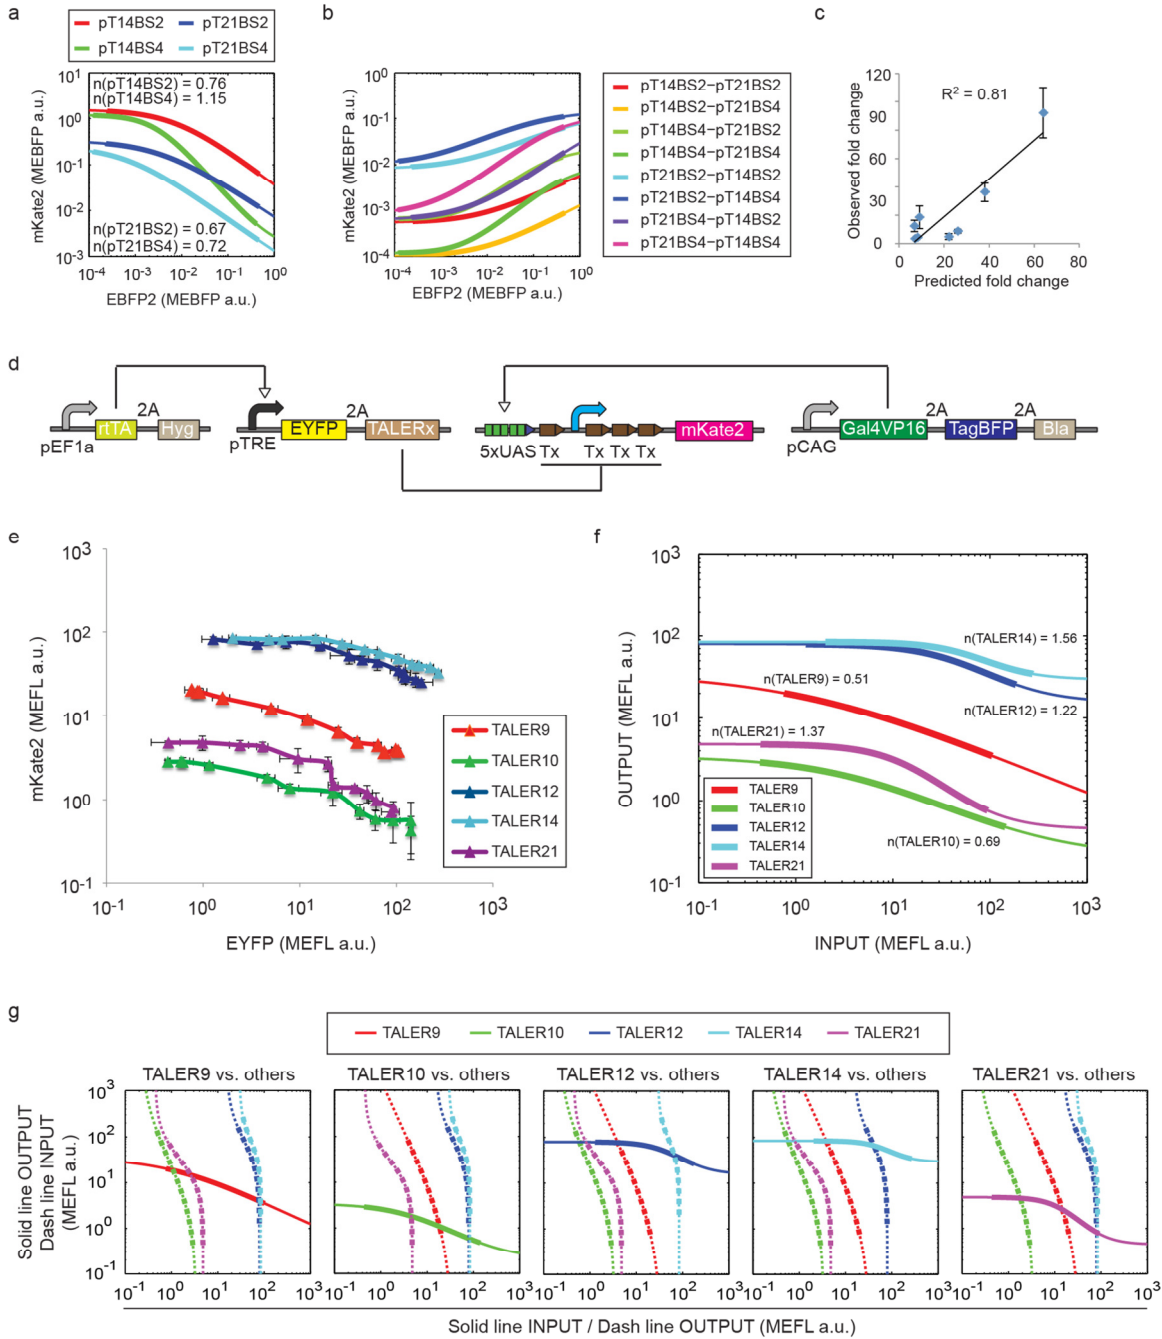

**Supplementary Figure 5.** Transfer function curve analysis of TALERS, TALER cascades and TALER switches.

(a) Computationally fitted transfer curves using Hill functions for data shown in Fig. 2.  $n(pTxBS2)$  or  $n(pTxBS4)$  indicate Hill coefficients. The thick region, and thin region of each curve represents experimentally observed input range and extrapolated values based on fitted function, respectively. The Hill coefficients range from 0.67 to 1.15. (b) Simulated cascade transfer curves based on the transfer curves of individual TALERS. (c)

Pearson correlation, calculated as R squared, between predicted and observed maximum fold changes of TALER cascades. (d) Schematic of circuits used for measuring transfer function curves of 2A-tag linked TALER. Tx, binding site for TALERx; 5×UAS, five upstream activation sites; The blue arrow represents a minimal CMV promoter. Lines with arrows indicate up regulation and lines with bars indicate down regulation. (e) Observed data points, calculated as normalized fluorescence, on transfer curves. Each data point shows mean  $\pm$  SD of fluorescent reporter from three independent replicates. (f) Transfer function curves fitted with Hill functions.  $n(\text{TALERx})$  shows Hill coefficient that ranges from 0.51 to 1.56. (g) Nullcline analysis of TALER switches based on transfer curves fitted with Hill functions in (d), (e), (f). Solid lines represent TALER transfer curves. Dash lines represent transfer curves where OUTPUT is plotted on the horizontal axis and INPUT is plotted on the vertical axis.

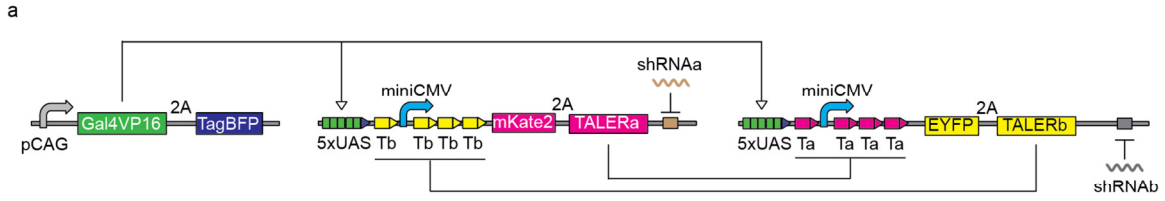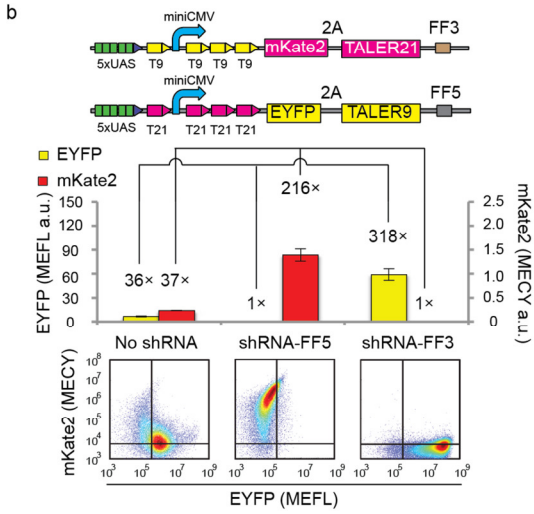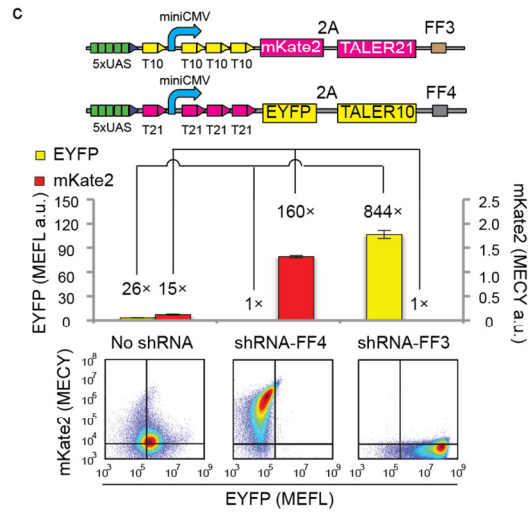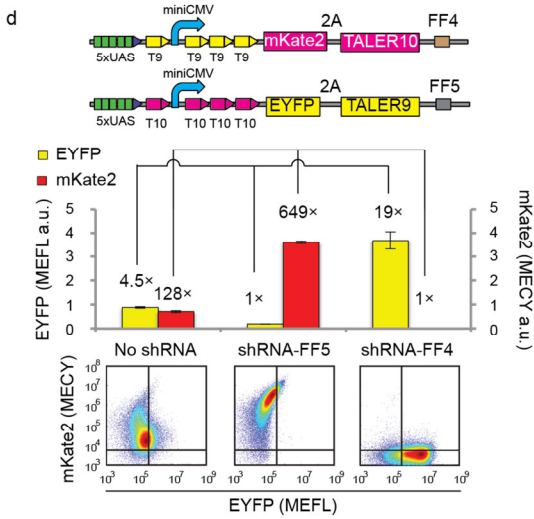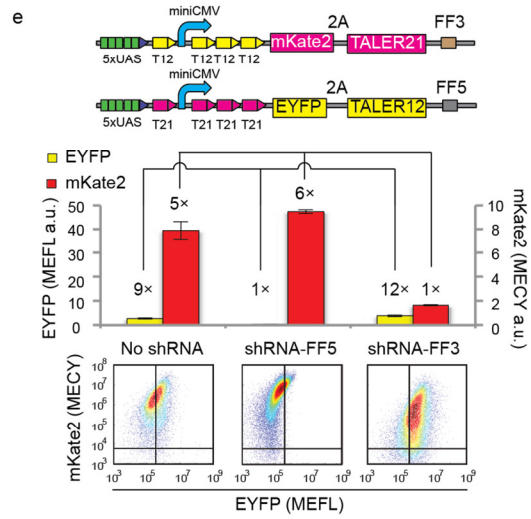

(Continued)

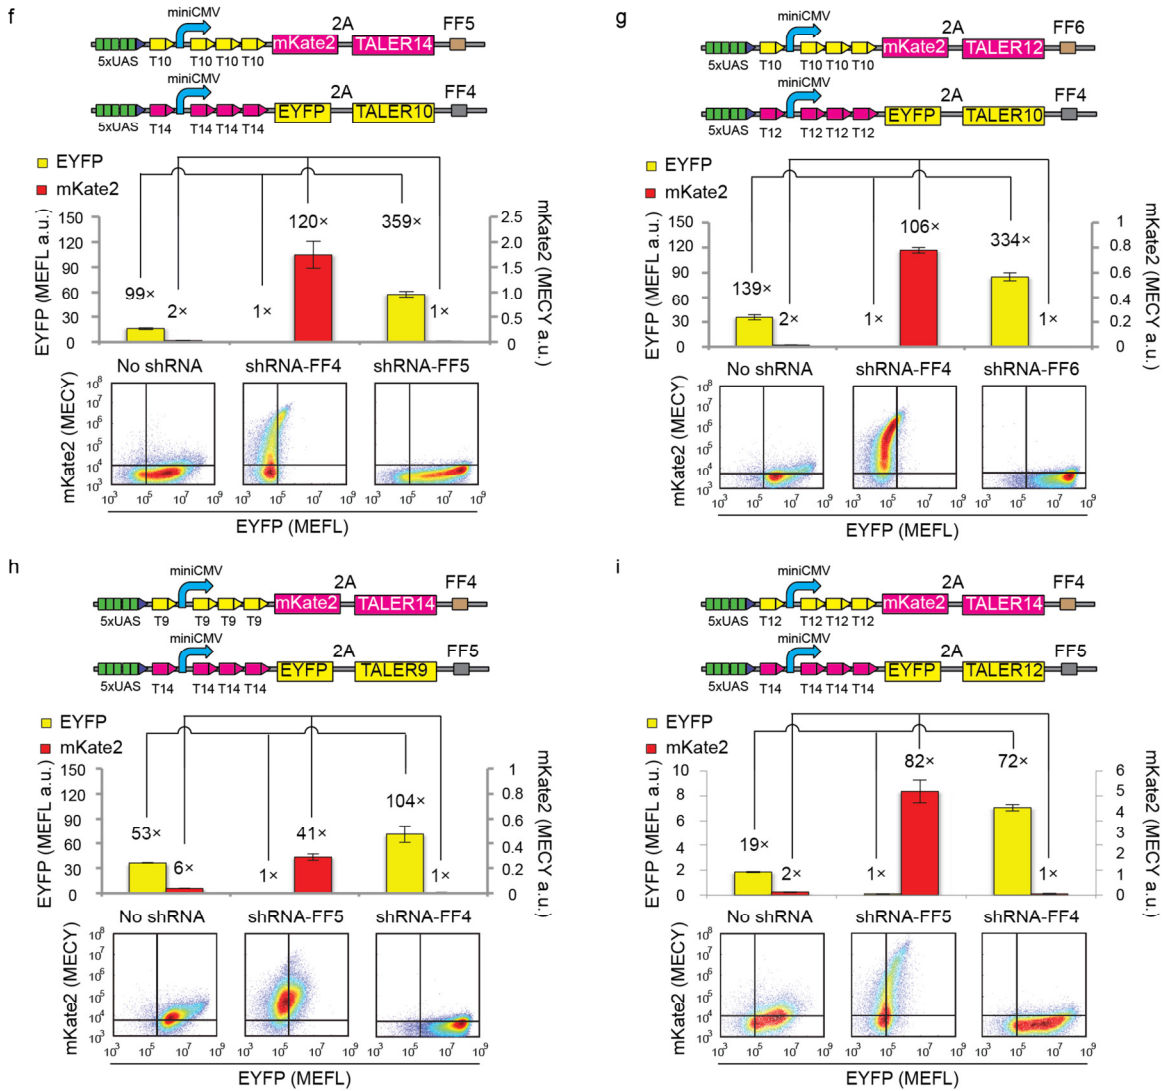

**Supplementary Figure 6.** Control of TALER sensory switch by using shRNAs.

(a) Circuit diagram. Each TALER is monitored by 2A-tag linked mKate2 or EYFP fluorescence. The waved lines represent shRNAs. shRNA targets are shown as a wider box. (b) to (i) Resetting TALER switch state by shRNA. The upper panel shows schematics of tested TALER sensory switches. Each bar shows mean  $\pm$  SD of EYFP or mKate2 from three independent replicates. The lower panel shows representative flow cytometry scatter plots.

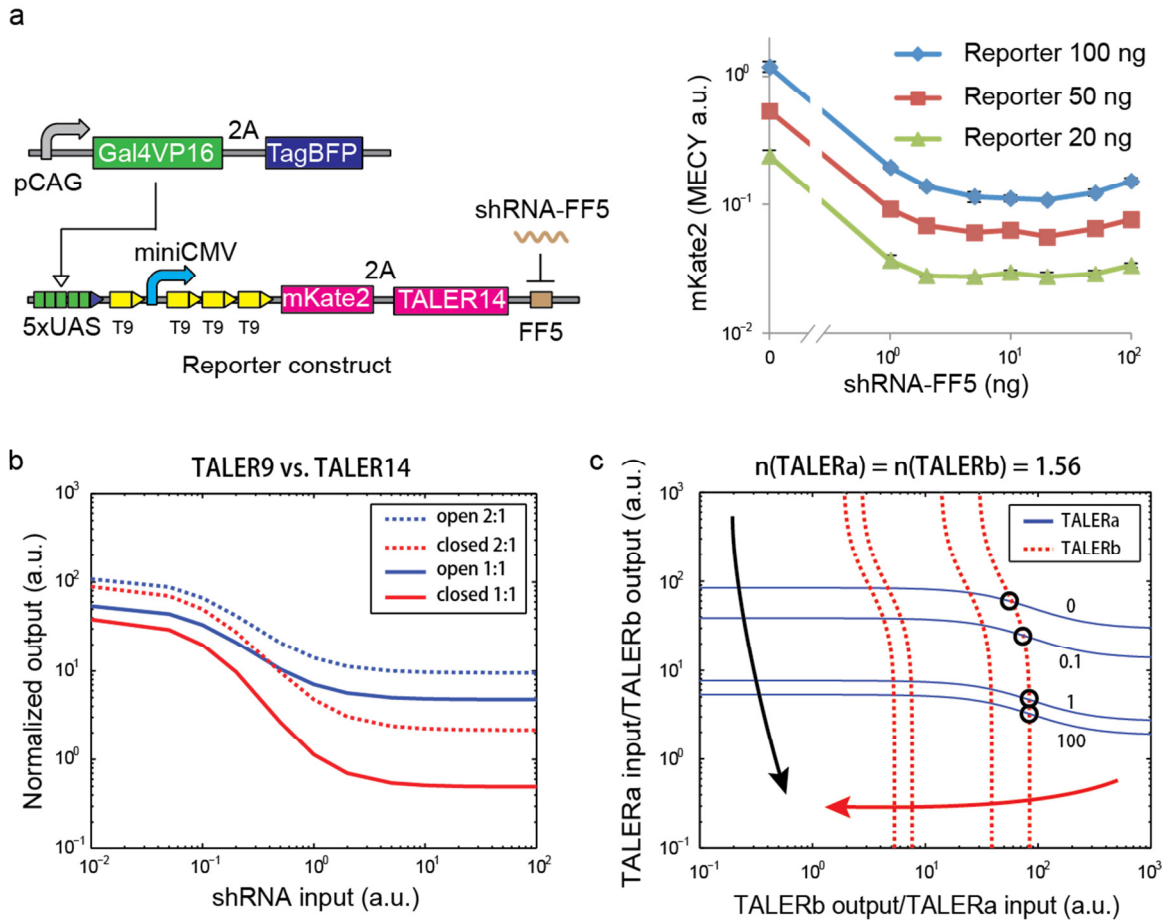

**Supplementary Figure 7.** Simulation of TALER sensory switches

(a) Experimentally measured knockdown of shRNA-FF5 reporter at different shRNA-FF5 doses. Three different reporter concentrations were used as indicated. (b) Simulation of closed-loop TALER switch made of TALER9 and TALER14 with mutual inhibition and the open-loop counterpart without mutual inhibition. Ratio of TALER9 to TALER14 used in simulation is indicated as 1:1 or 2:1. (c) Simulation of miRNA/shRNA regulating a TALER switch using transfer function of TALER14 and shRNA-FF5 knockdown. Hill coefficient  $n=1.56$  is derived from TALER14. Blue solid lines represent simulated transfer functions of TALERa with 0, 0.1, 1, and 100 ng shRNA-FF5 which regulates TALERa. The black arrow indicates increasing concentrations of shRNA-FF5. Red solid lines represent simulated transfer functions of TALERb with 0, 0.1, 1 and 100 ng shRNA-FF5 which regulates TALERb. The red arrow indicates increasing concentrations of shRNA-FF5. Black circles represent the predicted equilibrium states of the switch composed of TALERb with no shRNA-FF5 and TALERa with 0, 0.1, 1 and 100 ng shRNA-FF5, respectively.

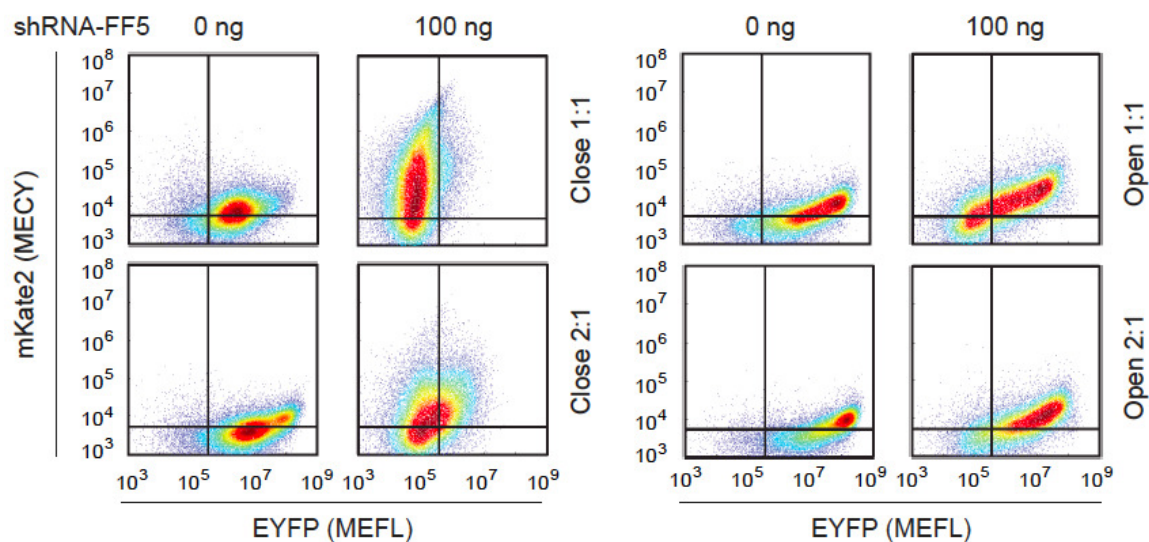

**Supplementary Figure 8.** Responses of TALER sensory switches to shRNA inputs

Representative flow cytometry scatter plots measured 48 h post-transfection for indicated circuit configuration shown in Fig. 4 without shRNA or with 100 ng of shRNA. Ratio of TALER9 to TALER14 (or TALER10) used in transfection experiments is indicated as 1:1 or 2:1. Closed: closed-loop circuit; Open: open-loop circuit.

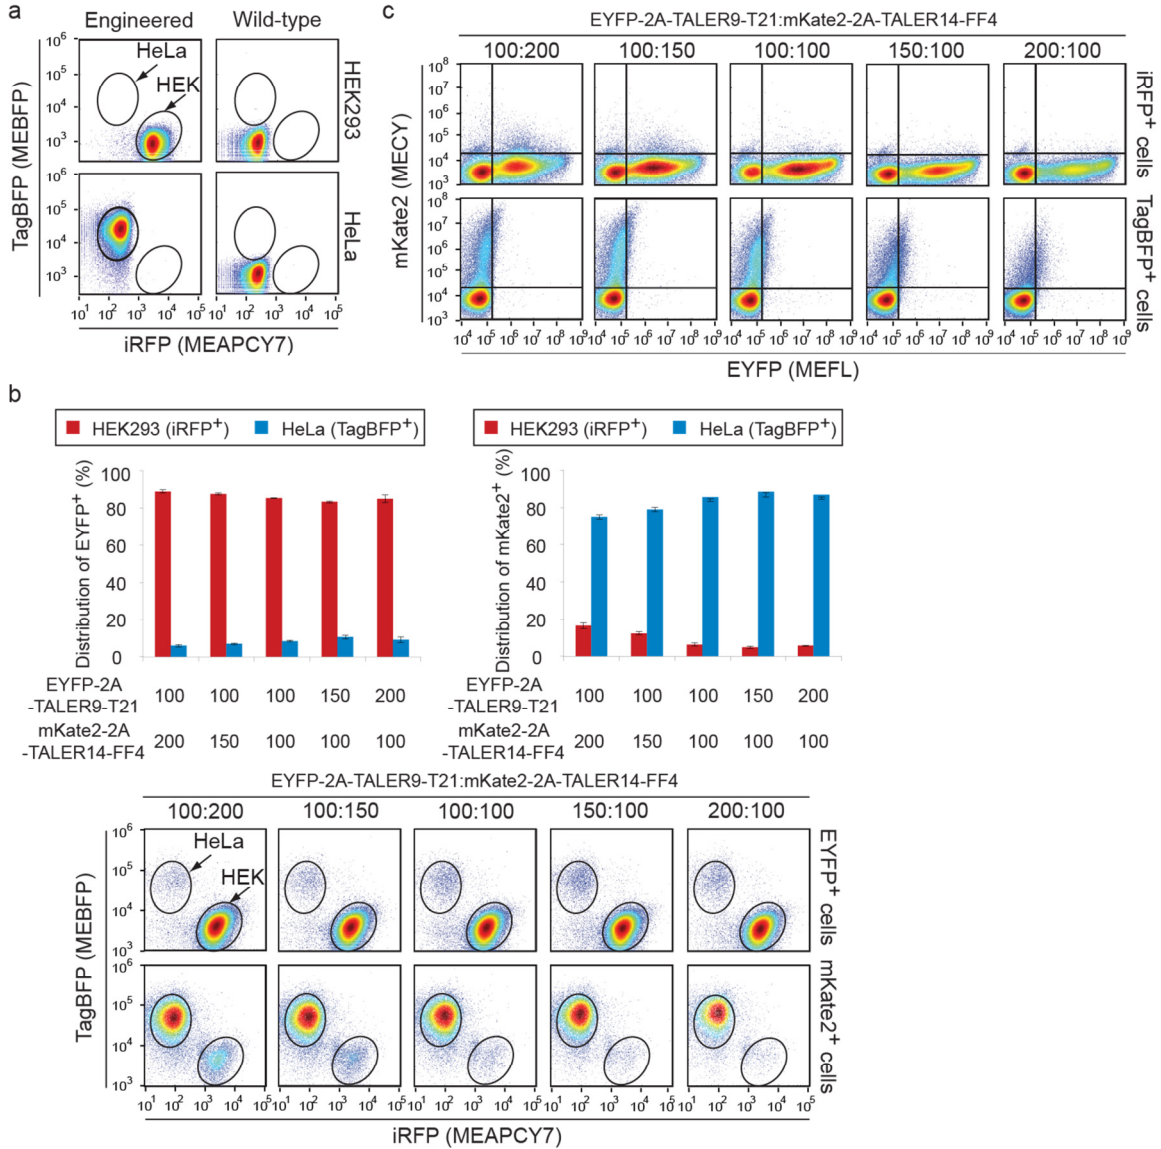

**Supplementary Figure 9.** Classification of engineered cell lines using microRNAs and TALER sensory switches.

(a) Scatter plots of engineered cell and wild-type HEK293 and HeLa cells. Circles represent gates for HEK293:iRFP\_shRNA-FF4 and HeLa:TagBFP cells. (b) Cell classification with a TALER switch in a mixed cell population. Indicated amount of TALER DNA (ng) were used in transfection experiments. Each bar shows mean  $\pm$  SD from three independent replicates. FACS data is shown in the scatter plot. The upper row shows distribution of EYFP<sup>+</sup> cells on iRFP-TagBFP scatter plots, and the lower row shows distribution of mKate2<sup>+</sup> cells on iRFP-TagBFP scatter plots. Circles indicate engineered HEK293 or HeLa cell population. (c) Representative EYFP-mKate2 scatter plots of FACS data shown in (b). Numbers on the top are ratios of two TALERs (EYFP-

2A-TALER9-T21:mKate2-2A-TALER-FF4) used in TALER switch. The upper row shows distribution of HEK293 iRFP<sup>+</sup> cells on EYFP-mKate2 scatter plots, and the lower row shows distribution of HeLa TagBFP<sup>+</sup> cells on EYFP-mKate2 scatter plots.



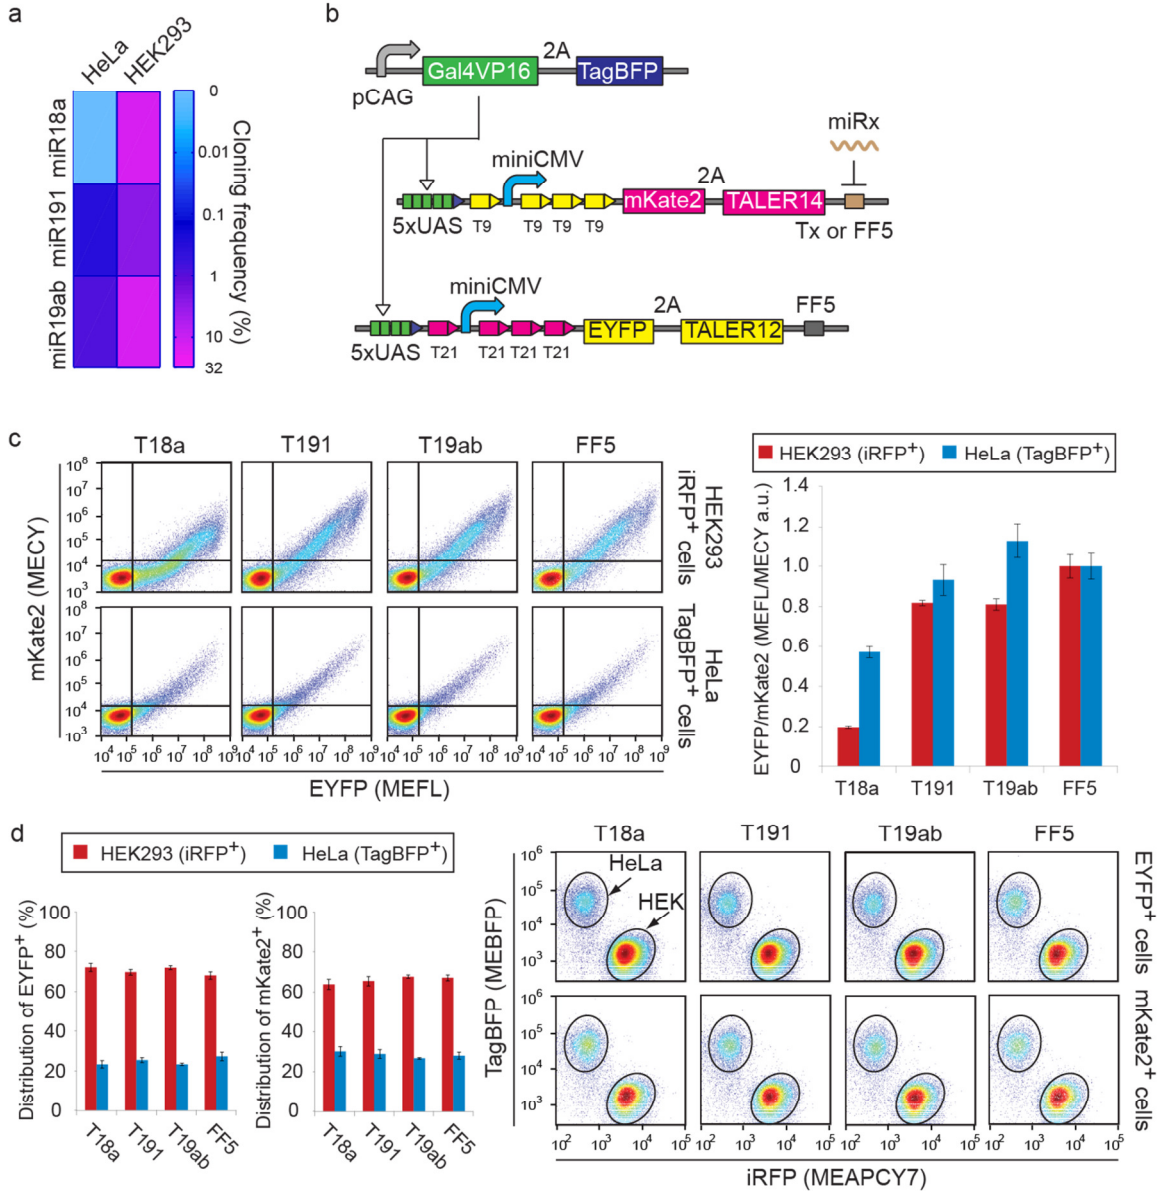

**Supplementary Figure 10.** Selection of HEK293-specific microRNAs in mixed cell population.

(a) Expression levels of selected microRNAs in HEK293 and HeLa cells. Cloning frequency is calculated using microRNA Atlas database<sup>1</sup>. MiR19ab is a combo microRNA marker that adds the expression level of both miR19a and miR19b. (b) Schematic of circuits. Each TALER is monitored by 2A-tag linked mKate2 or EYFP fluorescence. miRx, miR18a, miR191 or miR19ab. Tx or FF5, four tandem repeats of fully complementary target site for miR18a, miR191, miR19ab or shRNA-FF5. Indicated circuit was transfected into a mixed population of HEK293:iRFP\_shRNA-FF4 and HeLa:TagBFP cells. (c) Left panel shows representative EYFP-mKate2 scatter plots of

HEK293 iRFP<sup>+</sup> cells and HeLa TagBFP<sup>+</sup> cells. Right panel shows microRNA knockdown efficiency in indicated cell type. Each bar shows mean of mkate2 divided by mean of EYFP from three independent replicates. (d) The bar chart in the left panel shows the fraction of engineered HEK293 and HeLa in EYFP<sup>+</sup> or mKate2<sup>+</sup> cell population. Each bar shows mean  $\pm$  SD from three independent replicates. FACS scatter plots are shown in the right panel. The upper row shows distribution of EYFP<sup>+</sup> cells on iRFP-TagBFP scatter plots, and the lower row shows distribution of mKate2<sup>+</sup> cells on iRFP-TagBFP scatter plots. Circles indicate engineered HEK293 or HeLa cell population.

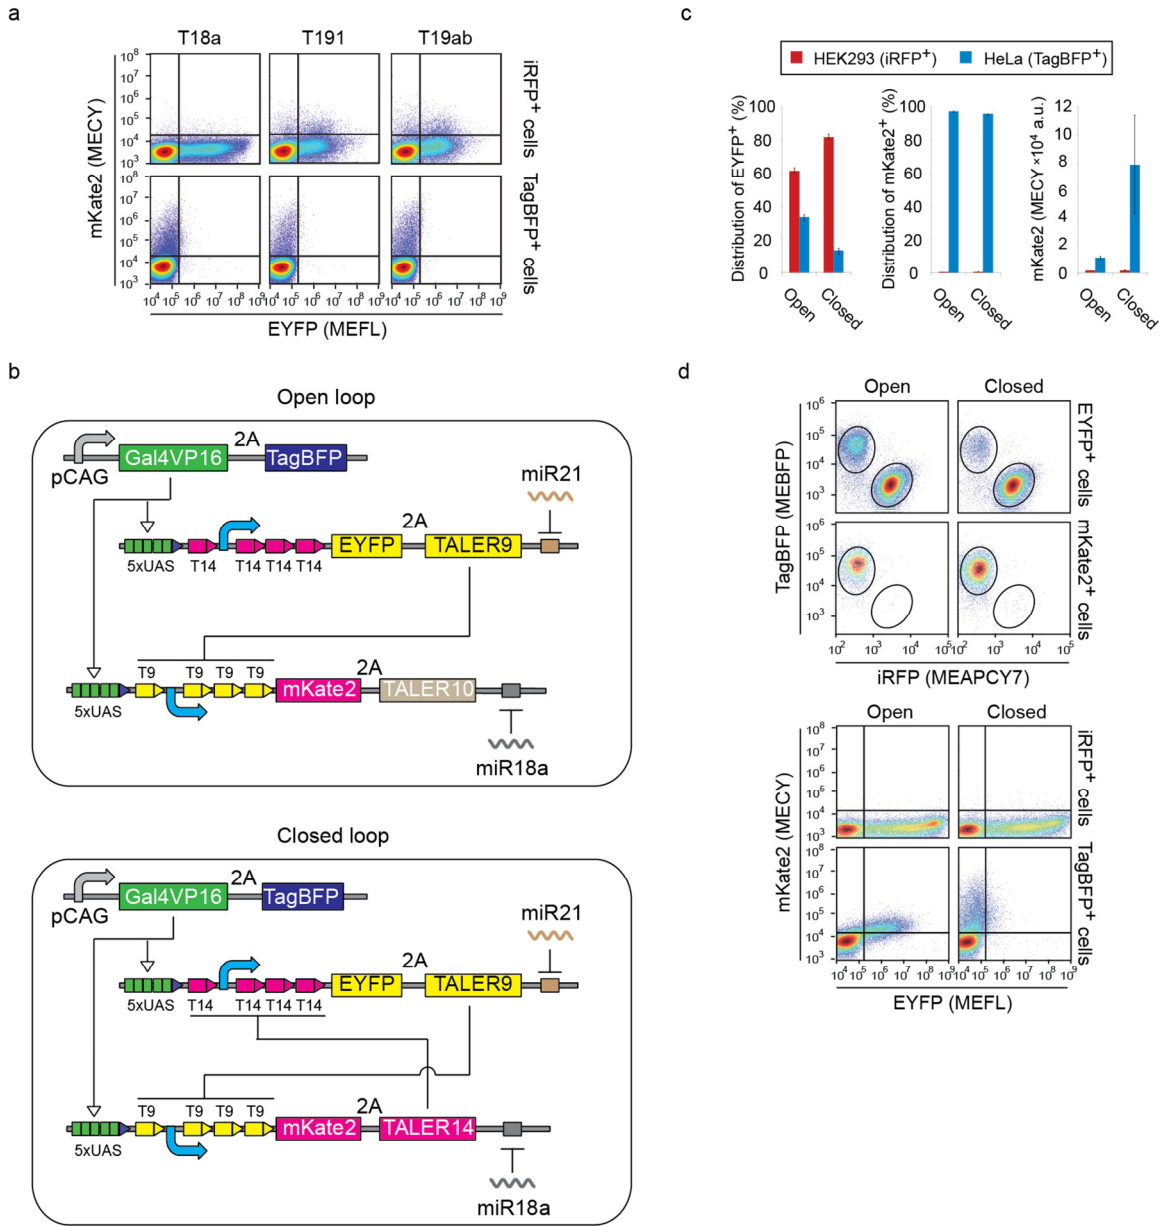

**Supplementary Figure 11.** Connecting endogenous microRNAs to control TALER sensory switches enables cell-type classification.

(a) Representative EYFP-mKate2 scatter plots of FACS data shown in Fig. 6c. T18a, T191 and T19ab are four tandem repeats of fully complementary target site for miR18a, miR191 and miR19ab that fused in mKate2-2A-TALER constructs, respectively. The upper row shows distribution of HEK293 iRFP<sup>+</sup> cells on EYFP-mKate2 scatter plots, and the lower row shows distribution of HeLa TagBFP<sup>+</sup> cells on EYFP-mKate2 scatter plots. (b) Schematic representation of a closed-loop TALER switch with mutual inhibition and the open-loop counterpart without mutual inhibition. Each TALER is monitored by 2A-

tag linked mKate2 or EYFP fluorescence. Four tandem repeats of fully complementary target site for miR18a or miR21 are fused in the 3'-UTR of indicated TALER constructs. Indicated circuit was transfected into a mixed population of HEK293:iRFP\_shRNA-FF4 and HeLa:TagBFP cells. (c) The first two bar charts show the fraction of engineered HEK293 and HeLa in EYFP<sup>+</sup> or mKate2<sup>+</sup> cell sub-populations. The third bar chart shows the mean mKate2 values of engineered HEK293 and HeLa. Each bar shows mean  $\pm$  SD from three independent replicates. (d) The upper panel shows distribution of EYFP<sup>+</sup> or mKate2<sup>+</sup> cells in iRFP-TagBFP scatter plots. Circles indicate engineered HEK293 or HeLa cell sub-populations. The lower panel shows representative EYFP-mKate2 scatter plots of HEK293 iRFP<sup>+</sup> cells and HeLa TagBFP<sup>+</sup> cells.

# Supplementary Tables

## Supplementary Table 1. TALER RVD sequences

| TALER ID | Reference                  | Original ID | TALE(N) tag/ve/organism | Length | Binding site               | The position of RVD in TALER |    |    |    |    |    |    |    |    |    |    |    |    |    |    |    |    |    |    |    |    |    |    |    |    |    |    |    |    |    |    |    |
|----------|----------------------------|-------------|-------------------------|--------|----------------------------|------------------------------|----|----|----|----|----|----|----|----|----|----|----|----|----|----|----|----|----|----|----|----|----|----|----|----|----|----|----|----|----|----|----|
|          |                            |             |                         |        |                            | 1                            | 2  | 3  | 4  | 5  | 6  | 7  | 8  | 9  | 10 | 11 | 12 | 13 | 14 | 15 | 16 | 17 | 18 | 19 | 20 | 21 | 22 | 23 | 24 |    |    |    |    |    |    |    |    |
| TALER1   | Zhang et al. <sup>2</sup>  | TALE1       | Synthetic               | 14     | TACGACTCACTATA             | NI                           | HD | NI | NI | HD | NG | HD | NI | HD | NG | NI | NI | NI | NI | NI |    |    |    |    |    |    |    |    |    |    |    |    |    |    |    |    |    |
| TALER2   | Zhang et al. <sup>2</sup>  | TALE4       | Synthetic               | 14     | TAAGAAATAAATATA            | NI                           | NI | NI | NI | NI | NI | NI | NI | NI | NI | NI | NI | NI | NI | NI | NI |    |    |    |    |    |    |    |    |    |    |    |    |    |    |    |    |
| TALER4   | Zhang et al. <sup>2</sup>  | TALE8       | Synthetic               | 14     | TACCACACTACTATA            | NI                           | HD | HD | NI | HD | NG | HD | NI | HD | NG | NI | NI | NI | NI | NI | NI |    |    |    |    |    |    |    |    |    |    |    |    |    |    |    |    |
| TALER5   | Cermak et al. <sup>3</sup> | pZHY096     | SUR8/Tobacco            | 18     | TACTGAATATCAACT            | NI                           | HD | NG | NI |    |    |    |    |    |
| TALER9   | Cermak et al. <sup>3</sup> | pZHY106     | SUR8/Tobacco            | 21     | TATAGAACCGATCCCAATT        | NI                           | HD | HD | NG | HD | NI |    |    |    |    |    |
| TALER10  | Cermak et al. <sup>3</sup> | pZHY108     | SUR8/Tobacco            | 20     | TACTCTGAGCAACTGTT          | NI                           | HD | HD | NG | HD | NI |    |    |    |    |
| TALER11  | Cermak et al. <sup>3</sup> | pZHY109     | SUR8/Tobacco            | 20     | TCTTTGAAAGCCGCCCACT        | NI                           | NG | NG | NG | NI |    |    |    |    |
| TALER12  | Cermak et al. <sup>3</sup> | pTAL112     | grblock/zebrafish       | 18     | TATTTGAGCTCACTTCT          | NI                           | NG | NG | NG | NI |    |    |    |    |
| TALER13  | Cermak et al. <sup>3</sup> | pTAL117     | grblock/zebrafish       | 17     | TCCGGGAAGCCGATGCT          | HD                           | HD | HD | NI |    |    |    |
| TALER14  | Cermak et al. <sup>3</sup> | grid_1L16   | grblock/zebrafish       | 17     | TACCCTCTCCGCTCT            | NI                           | HD | HD | HD | NI |    |    |    |
| TALER15  | Cermak et al. <sup>3</sup> | pTAL152N    | white/roseophila        | 25     | TCTGACATTCATCAAGCCCTCAT    | HD                           | HD | NG | NI | NI | HD | HD | NI |    |    |
| TALER16  | Cermak et al. <sup>3</sup> | pTAL153N    | white/roseophila        | 25     | TCCCTGCGCATCAAGAAGATCTT    | NI                           | HD | HD | HD | NG | HD | NI |    |
| TALER17  | Cermak et al. <sup>3</sup> | pTAL162N    | plasmepsin/plasmodium   | 25     | TATTATTGGCCTTAACCACTACTCTT | NI                           | NG | NG | NI | NG | NG | NN | NI |    |
| TALER18  | Cermak et al. <sup>3</sup> | pTAL163N    | plasmepsin/plasmodium   | 25     | TCCATGTAAACAATTTTCTGACAT   | HD                           | HD | NI | NG | NN | NI |    |
| TALER19  | Cermak et al. <sup>3</sup> | pTAL164N    | TT4/Arabidopsis         | 19     | TCCATCTCCCTGAMGATGT        | HD                           | HD | NI | NG | HD | HD | HD | NI |    |
| TALER20  | Cermak et al. <sup>3</sup> | pTAL165N    | TT4/Arabidopsis         | 25     | TTGAGACTCTCAACAATGTTCTTAT  | HD                           | NG | NI | NN | NI | HD | NG | HD | NI |    |
| TALER21  | Cermak et al. <sup>3</sup> | pTAL166N    | TT4/Arabidopsis         | 19     | TGTGCTCTTGCACTTAT          | NI                           | NI | NI | NG | HD | NI |    |
| TALER22  | Cermak et al. <sup>3</sup> | pTAL167N    | TT4/Arabidopsis         | 19     | TAGTCACACACGAGCATTT        | NI                           | NI | NI | NG | HD | NI |    |
| TALER23  | Cermak et al. <sup>3</sup> | pTAL169N    | ADH1/Arabidopsis        | 19     | TCCGATGCTCCCTTAAAT         | HD                           | HD | NI |    |
| TALER24  | Cermak et al. <sup>3</sup> | pTAL174N    | ADH1/Arabidopsis        | 19     | TGACAAACCAACTCTT           | NI                           | NI | NI | NI | NI | NI | NI | NI | NI | NI | NI | NI | NI | NI | NI | NI | NI | NI | NI | NI | NI | NI | NI | NI | NI | NI | NI | NI | NI | NI | NI |    |
| TALER26  | Zhang et al. <sup>2</sup>  | CAC2        | Synthetic               | 18     | TGGTAGACTCCAGGACTCA        | NI                           | NI | NI | NI | NI | NI | NI | NI | NI | NI | NI | NI | NI | NI | NI | NI | NI | NI | NI | NI | NI | NI | NI | NI | NI | NI | NI | NI | NI | NI | NI |    |
| TALER29  | Zhang et al. <sup>2</sup>  | TALE2       | Synthetic               | 14     | TCCGCTCCCTCTC              | HD                           | HD | NI | HD | NG | HD | NI | HD | HD |    |    |
| TALER30  | Zhang et al. <sup>2</sup>  | TALE5       | Synthetic               | 14     | TATGATTTATATA              | NI                           | NG | NI | NI | NG | NG | NI |    |
| TALER31  | Zhang et al. <sup>2</sup>  | TALE6       | Synthetic               | 13     | TAGGAGTGGAGTAT             | NI                           | NI | NI | NI | NI | NI | NI | NI | NI | NI | NI | NI | NI | NI | NI | NI | NI | NI | NI | NI | NI | NI | NI | NI | NI | NI | NI | NI | NI | NI | NI | NI |
| TALER32  | Zhang et al. <sup>2</sup>  | TALE7       | Synthetic               | 14     | TACAACCACTATA              | NI                           | HD | NI | NI | HD | NI |
| TALER33  | Zhang et al. <sup>2</sup>  | TT9         | Synthetic               | 14     | TTATATCCCGACA              | NI                           | NG | NI | NI | NG | NG | HD | HD | NI |    |

**Supplementary Table 2. Transfection configuration.**

| Plasmid DNA used in Figs. 1 and 2                          | Amount |
|------------------------------------------------------------|--------|
| phEF1 $\alpha$ -TagBFP-2A-Gal4VP16-FF5                     | 30 ng  |
| pCMV-TALER <sub>x</sub>                                    | 200 ng |
| pTy+Ty+(spacing or varying binding sites)-mKate2(or dsRed) | 50 ng  |

| Plasmid DNA used in Fig. 3b and Supplementary Fig. 9           | Amount  |
|----------------------------------------------------------------|---------|
| pTRE-TALER <sub>x</sub> -4xTarget <sup>^FFn</sup>              | 50 ng   |
| pTRE-EBFP2                                                     | 50 ng   |
| pTx+Tx(varying binding sites)+72-mKate2                        | 100 ng  |
| pCAG-EYFP                                                      | 50 ng   |
| pCAG-rtTA-2A-Gal4VP16                                          | 100 ng  |
| Final concentration of Dox                                     | z ng/mL |
| z = 0, 0.1, 0.2, 0.5, 1, 2, 5, 10, 20, 50, 100, 200, 500, 1000 |         |

| Plasmid DNA used in Fig. 3e and Supplementary Fig. 9           | Amount  |
|----------------------------------------------------------------|---------|
| pCAG-EYFP                                                      | 50 ng   |
| pCAG-rtTA-2A-Gal4VP16                                          | 100 ng  |
| pTRE-EBFP2                                                     | 50 ng   |
| pTRE-TALER <sub>x</sub> -4xTarget <sup>^FFn</sup>              | 50 ng   |
| pTx+Tx(varying binding sites)+72_TALER <sub>y</sub>            | 50 ng   |
| pTy+Ty(varying binding sites)+72-mKate2                        | 100 ng  |
| Final concentration of Dox                                     | z ng/mL |
| z = 0, 0.1, 0.2, 0.5, 1, 2, 5, 10, 20, 50, 100, 200, 500, 1000 |         |

| Plasmid DNA used in Fig. 4c                                        | Amount |
|--------------------------------------------------------------------|--------|
| pTn+Tnx3+72-EYFP-2A-TALER <sub>m</sub> -4xTarget <sup>^FFx</sup>   | 100 ng |
| pTm+Tmx3+72-mKate2-2A-TALER <sub>n</sub> -4xTarget <sup>^FFy</sup> | 100 ng |
| pCAG-Gal4VP16-2A-TagBFP-2A-Bla                                     | 100 ng |

| Plasmid DNA used in Fig. 4d, 4e and Supplementary Fig. 4           | Amount |
|--------------------------------------------------------------------|--------|
| pTn+Tnx3+72-EYFP-2A-TALER <sub>m</sub> -4xTarget <sup>^FFx</sup>   | 100 ng |
| pTm+Tmx3+72-mKate2-2A-TALER <sub>n</sub> -4xTarget <sup>^FFy</sup> | 100 ng |
| pCAG-Gal4VP16-2A-TagBFP-2A-Bla                                     | 100 ng |
| pSIREN_U6-shRNA <sup>^FFx/y</sup> -CMV-iRFP                        | 100 ng |

| Plasmid DNA used in Fig. 5 ratio 1:1. Bold numbers refer to plasmid amount for ratio 2:1. | Open-loop             | Closed-loop           |
|-------------------------------------------------------------------------------------------|-----------------------|-----------------------|
| pCAG-Gal4VP16-2A-TagBFP-2A-Bla                                                            | 100 ng                | 100 ng                |
| pT9+T9x3+72-mKate2-2A-TALER10-4xTarget <sup>FF4</sup>                                     | 100 ng                |                       |
| pT9+T9x3+72-mKate2-2A-TALER14-4xTarget <sup>FF4</sup>                                     |                       | 100 ng                |
| pT14+T14x3+72-EYFP-2A-TALER9-4xTarget <sup>FF5</sup>                                      | 100 ( <b>200</b> ) ng | 100 ( <b>200</b> ) ng |
| pSIREN_U6-shRNA <sup>FF5</sup> -CMV-iRFP                                                  | z ng                  | z ng                  |
| pDT7004                                                                                   | 100-z ng              | 100-z ng              |
| z = 0, 0.05, 0.1, 0.2, 0.5, 1, 2, 5, 10, 20, 50, 100                                      |                       |                       |

| Plasmid DNA used in Fig. 6b and Supplementary Fig. 7a           | Amount     |
|-----------------------------------------------------------------|------------|
| pCAG-Gal4VP16                                                   | 100 ng     |
| pT14+T14x3+72-EYFP-2A-TALER9-4xTarget <sup>miR21</sup>          | x ng       |
| pT9+T9x3+72-mKate2-2A-TALER14-4xTarget <sup>FF4</sup>           | y ng       |
| Final concentration of Dox                                      | 1000 ng/mL |
| (x:y) = (100:200), (100:150), (100:100), (150, 100), (200, 100) |            |

| Plasmid DNA used in Fig. 6c and Supplementary Fig. 7b  | Amount     |
|--------------------------------------------------------|------------|
| pCAG-Gal4VP16                                          | 100 ng     |
| pT9+T9x3+72-mKate2-2A-TALER14-4xTarget <sup>miRx</sup> | 100 ng     |
| pT14+T14x3+72-EYFP-2A-TALER9-4xTarget <sup>miR21</sup> | 100 ng     |
| Final concentration of Dox                             | 1000 ng/mL |

| Plasmid DNA used in Supplementary Fig. 2a            | Amount  |
|------------------------------------------------------|---------|
| phEF1 $\alpha$ -rtTA-2A-Hyg-FF5                      | 100 ng  |
| pCAG-EYFP                                            | 100 ng  |
| pTRE-EBFP2                                           | 100 ng  |
| pTRE-mKate2                                          | 100 ng  |
| Final concentration of Dox                           | z ng/mL |
| z = 0, 0.5, 1, 2, 5, 10, 20, 50, 100, 200, 500, 1000 |         |

| Plasmid DNA used in Supplementary Fig. 2b | Amount |
|-------------------------------------------|--------|
| phEF1 $\alpha$ -rtTA-2A-Hyg-FF5           | 100 ng |
| pCAG-TagBFP                               | 100 ng |
| pTRE-EYFP-2A-TALER14                      | 100 ng |
| pTRE-mKate2-2A-TALER14                    | 100 ng |

|                                                      |         |
|------------------------------------------------------|---------|
| Final concentration of Dox                           | z ng/mL |
| z = 0, 0.5, 1, 2, 5, 10, 20, 50, 100, 200, 500, 1000 |         |

|                                                      |         |
|------------------------------------------------------|---------|
| Plasmid DNA used in Supplementary Fig. 3             | Amount  |
| pHEF1 $\alpha$ -rtTA-2A-Hyg-FF5                      | 100 ng  |
| pCAG-Gal4VP16-2A-TagBFP-2A-Bla                       | 100 ng  |
| pTRE-EYFP-2A-TALERx-4xTarget <sup>^</sup> FFy        | 100 ng  |
| pTx+Tx+72-mKate2                                     | 100 ng  |
| Final concentration of Dox                           | z ng/mL |
| z = 0, 0.5, 1, 2, 5, 10, 20, 50, 100, 200, 500, 1000 |         |

|                                                         |          |
|---------------------------------------------------------|----------|
| Plasmid DNA used in Supplementary Fig. 5a               | Amount   |
| pCAG-Gal4VP16-2A-TagBFP-2A-Bla                          | 100 ng   |
| pT9+T9x3+72-mKate2-2A-TALER14-4xTarget <sup>^</sup> FF5 | x ng     |
| pSIREN_U6-shRNA <sup>^</sup> FF5-CMV-iRFP               | z ng     |
| pDT7004                                                 | 100-z ng |
| x = 20, 50, 100                                         |          |
| z = 0, 1, 2, 5, 10, 20, 50, 100                         |          |

|                                                          |        |
|----------------------------------------------------------|--------|
| Plasmid DNA used in Supplementary Fig. 6                 | Amount |
| pCAG-Gal4VP16                                            | 100 ng |
| pT9+T9x3+72-mKate2-2A-TALER14-4xTarget <sup>^</sup> miRx | 100 ng |
| pT21+T21x3+72-EYFP-2A-TALER12-4xTarget <sup>^</sup> FF5  | 100 ng |

|                                                          |           |             |
|----------------------------------------------------------|-----------|-------------|
| Plasmid DNA used in Supplementary Fig. 7c and 7d         | Open-loop | Closed-loop |
| pCAG-Gal4VP16                                            | 100 ng    | 100 ng      |
| pT14+T14x3+72-EYFP-2A-TALER9-4xTarget <sup>^</sup> miR21 | 100 ng    | 100 ng      |
| pT9+T9x3+72-mKate2-2A-TALER10-4xTarget <sup>^</sup> miRx | 100 ng    |             |
| pT9+T9x3+72-mKate2-2A-TALER14-4xTarget <sup>^</sup> miRx |           | 100 ng      |



**Supplementary Table 3. Plasmid DNA constructs**

| GenBank Accession Number | Plasmid Description            | GenBank Accession Number | Plasmid Description                                     |
|--------------------------|--------------------------------|--------------------------|---------------------------------------------------------|
| KM486811                 | pCAG-VP16Gal4                  | KM486876                 | pT9+T9x3+72-mKate2-2A-TALER21-4xTarget <sup>FF3</sup>   |
| KM486812                 | pCAG-EBFP2                     | KM486877                 | pT10+T10+72-mKate2                                      |
| KM486813                 | pCAG-EYFP                      | KM486878                 | pT10+T10x3+72-EYFP-2A-TALER9-4xTarget <sup>FF5</sup>    |
| KM486814                 | pCAG-Gal4VP16-2A-TagBFP-2A-Bla | KM486879                 | pT10+T10x3+72-mKate2                                    |
| KM486815                 | pCAG-mKate2                    | KM486880                 | pT10+T10x3+72-mKate2-2A-TALER12-4xTarget <sup>FF6</sup> |
| KM486816                 | pCAG-rtTA-2A-Gal4VP16          | KM486881                 | pT10+T10x3+72-mKate2-2A-TALER14-4xTarget <sup>FF4</sup> |
| KM486817                 | pCAG-TagBFP                    | KM486882                 | pT10+T10x3+72-mKate2-2A-TALER21-4xTarget <sup>FF3</sup> |
| KM486818                 | pCMV-TALER1                    | KM486883                 | pT11+T11+72-mKate2                                      |
| KM486819                 | pCMV-TALER2                    | KM486884                 | pT12+T12+72-mKate2                                      |
| KM486820                 | pCMV-TALER4                    | KM486885                 | pT12+T12x3+72-EYFP-2A-TALER9-4xTarget <sup>FF5</sup>    |
| KM486821                 | pCMV-TALER5                    | KM486886                 | pT12+T12x3+72-EYFP-2A-TALER10-4xTarget <sup>FF4</sup>   |
| KM486822                 | pCMV-TALER9                    | KM486887                 | pT12+T12x3+72-mKate2                                    |
| KM486823                 | pCMV-TALER10                   | KM486888                 | pT12+T12x3+72-mKate2-2A-TALER14-4xTarget <sup>FF4</sup> |
| KM486824                 | pCMV-TALER11                   | KM486889                 | pT12+T12x3+72-mKate2-2A-TALER21-4xTarget <sup>FF3</sup> |
| KM486825                 | pCMV-TALER12                   | KM486890                 | pT13+T13+72-mKate2                                      |
| KM486826                 | pCMV-TALER13                   | KM486891                 | pT14+T14+72-mKate2                                      |
| KM486827                 | pCMV-TALER14                   | KM486892                 | pT14+T14+72-TALER21                                     |
| KM486828                 | pCMV-TALER15                   | KM486893                 | pT14+T14x3+72-EYFP-2A-TALER9-4xTarget <sup>FF5</sup>    |
| KM486829                 | pCMV-TALER16                   | KM486894                 | pT14+T14x3+72-EYFP-2A-TALER9-4xTarget <sup>miR21</sup>  |
| KM486830                 | pCMV-TALER17                   | KM486895                 | pT14+T14x3+72-EYFP-2A-TALER10-4xTarget <sup>FF4</sup>   |
| KM486831                 | pCMV-TALER18                   | KM486896                 | pT14+T14x3+72-EYFP-2A-TALER12-4xTarget <sup>FF5</sup>   |
| KM486832                 | pCMV-TALER19                   | KM486897                 | pT14+T14x3+72-mKate2                                    |
| KM486833                 | pCMV-TALER20                   | KM486898                 | pT14+T14x3+72-mKate2-2A-TALER21-4xTarget <sup>FF3</sup> |
| KM486834                 | pCMV-TALER21                   | KM486899                 | pT14+T14x3+72-TALER21                                   |
| KM486835                 | pCMV-TALER22                   | KM486900                 | pT15+T15+72-mKate2                                      |
| KM486836                 | pCMV-TALER23                   | KM486901                 | pT16+T16+72-mKate2                                      |
| KM486837                 | pCMV-TALER24                   | KM486902                 | pT17+T17+72-mKate2                                      |
| KM486838                 | pCMV-TALER26                   | KM486903                 | pT18+T18+72-mKate2                                      |
| KM486839                 | pCMV-TALER29                   | KM486904                 | pT19+T19+72-mKate2                                      |

|          |                                                       |          |                                                        |
|----------|-------------------------------------------------------|----------|--------------------------------------------------------|
| KM486840 | pCMV-TALER30                                          | KM486905 | pT20+T20+72-mKate2                                     |
| KM486841 | pCMV-TALER31                                          | KM486906 | pT21+T21+72-mKate2                                     |
| KM486842 | pCMV-TALER32                                          | KM486907 | pT21+T21+72-TALER14                                    |
| KM486843 | pCMV-TALER35                                          | KM486908 | pT21+T21x3+72-EYFP-2A-TALER14-4xTarget <sup>FF4</sup>  |
| KM486844 | phEF1 $\alpha$ -EYFP-2A-Hyg                           | KM486909 | pT21+T21x3+72-EYFP-2A-TALER9-4xTarget <sup>FF5</sup>   |
| KM486845 | phEF1 $\alpha$ -rtTA-2A-Hyg-FF5                       | KM486910 | pT21+T21x3+72-EYFP-2A-TALER10-4xTarget <sup>FF4</sup>  |
| KM486846 | phEF1 $\alpha$ -TagBFP-2A-Gal4VP16-FF5                | KM486911 | pT21+T21x3+72-EYFP-2A-TALER12-4xTarget <sup>FF5</sup>  |
| KM486847 | pSIREN_U6-shRNA <sup>FF3</sup> -CMV-iRFP              | KM486912 | pT21+T21x3+72-mKate2                                   |
| KM486848 | pSIREN_U6-shRNA <sup>FF4</sup> -CMV-iRFP              | KM486913 | pT21+T21x3+72-TALER14                                  |
| KM486849 | pSIREN_U6-shRNA <sup>FF5</sup> -CMV-iRFP              | KM486914 | pT22+T22+72-mKate2                                     |
| KM486850 | pSIREN_U6-shRNA <sup>FF6</sup> -CMV-iRFP              | KM486915 | pT23+T23+72-mKate2                                     |
| KM486851 | pT1+T1+72-DsRed                                       | KM486916 | pT24+T24+72-mKate2                                     |
| KM486852 | pT1+T1+72-mKate2                                      | KM486917 | pT26+T26+72-mKate2                                     |
| KM486853 | pT1+T2+72-DsRed                                       | KM486918 | pT29+T29+72-mKate2                                     |
| KM486854 | pT1+T1+78-mKate2                                      | KM486919 | pT30+T30+72-mKate2                                     |
| KM486855 | pT1+T1+83-mKate2                                      | KM486920 | pT31+T31+72-mKate2                                     |
| KM486856 | pT1+T1+89-mKate2                                      | KM486921 | pT32+T32+72-mKate2                                     |
| KM486857 | pT1+T1+94-mKate2                                      | KM486922 | pT32+T32x3+72-mKate2                                   |
| KM486858 | pT1+T1+100-mKate2                                     | KM486923 | pT35+T35+72-mKate2                                     |
| KM486859 | pT2+T1+72-DsRed                                       | KM486924 | pTRE-EBFP2                                             |
| KM486860 | pT2+T2+72-DsRed                                       | KM486925 | pTRE-EYFP                                              |
| KM486861 | pT2+T2+72-mKate2                                      | KM486926 | pTRE-EYFP-2A-TALER9-4xTarget <sup>FF5</sup>            |
| KM486862 | pT2+T2x3+72-mKate2                                    | KM486927 | pTRE-EYFP-2A-TALER10-4xTarget <sup>FF4</sup>           |
| KM486863 | pT4+T4+72-mKate2                                      | KM486928 | pTRE-EYFP-2A-TALER12-4xTarget <sup>FF5</sup>           |
| KM486864 | pT4+T4x3+72-mKate2                                    | KM486929 | pTRE-EYFP-2A-TALER14-4xTarget <sup>FF4</sup>           |
| KM486865 | pT5+T5+72-mKate2                                      | KM486930 | pTRE-EYFP-2A-TALER21-4xTarget <sup>FF5</sup>           |
| KM486866 | pT5+T5x3+72-mKate2                                    | KM486931 | pTRE-mKate2                                            |
| KM486867 | pT9+T9+72-mKate2                                      | KM486932 | pTRE-mKate2-2A-TALER14                                 |
| KM486868 | pT9+T9x3+72-mKate2                                    | KM486933 | pTRE-TALER14-4xTarget <sup>FF4</sup>                   |
| KM486869 | pT9+T9x3+72-mKate2-2A-TALER10-4xTarget <sup>FF4</sup> | KM486934 | pTRE-TALER21-4xTarget <sup>FF3</sup>                   |
| KM486870 | pT9+T9x3+72-mKate2-2A-TALER12-4xTarget <sup>FF6</sup> | KM519784 | pT9+T9x3+72-mKate2-2A-TALER10-4xTarget <sup>FF5</sup>  |
| KM486871 | pT9+T9x3+72-mKate2-2A-TALER14-4xTarget <sup>FF4</sup> | KM519785 | pT9+T9x3+72-mKate2-2A-TALER10-4xTarget <sup>T18a</sup> |

|          |                                              |          |                                                    |
|----------|----------------------------------------------|----------|----------------------------------------------------|
| KM486872 | pT9+T9x3+72-mKate2-2A-TALER14-4xTarget^FF5   | KM519786 | pTRE-mKate2-2A-TALER12-4xTarget^FF4                |
| KM486873 | pT9+T9x3+72-mKate2-2A-TALER14-4xTarget^T18a  | KM519787 | pH1TO-hEF1 $\alpha$ -TetR-2A-TagBFP-2A-Bla         |
| KM486874 | pT9+T9x3+72-mKate2-2A-TALER14-4xTarget^T19ab | KM519788 | pH1TO-shRNA^FF4-hEF1 $\alpha$ -TetR-2A-iRFP-2A-Bla |
| KM486875 | pT9+T9x3+72-mKate2-2A-TALER14-4xTarget^T191  |          |                                                    |

**Supplementary Table 4. Minimal Hamming distance between TALER binding sites and genomic sequences of genes differentially expressed**

| Experiment: Hygro-T09 and TALER10-T10 |                          |
|---------------------------------------|--------------------------|
| DE gene                               | Minimal Hamming distance |
| AHNAK                                 | 6                        |
| BACE1-AS                              | 8                        |
| CAMKMT                                | 4                        |
| DNAJB1                                | 8                        |
| GOPC                                  | 5                        |
| KLC1                                  | 6                        |
| SIRT7                                 | 6                        |
| SLMO2-ATP5E                           | 6                        |
| SNAR-C3                               | 7                        |
| STK10                                 | 5                        |
| ZNF613                                | 7                        |

| Experiment: Hygro-T09 and TALER12-T12 |                          |
|---------------------------------------|--------------------------|
| DE gene                               | Minimal Hamming distance |
| ANKHD1                                | 5                        |
| ATXN7L2                               | 6                        |
| C14orf169                             | 5                        |
| C20orf96                              | 6                        |
| C6orf203                              | 6                        |
| CAND1                                 | 5                        |
| CAPG                                  | 6                        |
| CCRN4L                                | 5                        |
| CDC45                                 | 5                        |
| GLT8D1                                | 6                        |
| GRB2                                  | 5                        |
| HIST2H4A                              | 7                        |
| HIST2H4B                              | 7                        |
| LOC642846                             | 5                        |
| NAB2                                  | 6                        |
| NUP153                                | 5                        |

|         |   |
|---------|---|
| PI4KAP2 | 5 |
| RNF2    | 5 |
| SLC27A3 | 6 |
| SMA4    | 3 |
| SNAR-C3 | 6 |
| STAG3L3 | 5 |
| TCEAL7  | 6 |
| UBXN8   | 6 |
| ZFP36L2 | 6 |

| Experiment: | Hygro-T09 and TALER14-T14 |
|-------------|---------------------------|
| DE gene     | Minimal Hamming distance  |
| CCDC51      | 5                         |
| GLUD1       | 4                         |
| GSTO2       | 4                         |
| LMNB2       | 4                         |
| NUDT6       | 5                         |
| RAC1        | 5                         |
| RASSF4      | 4                         |
| RHOT1       | 5                         |
| SPRTN       | 5                         |
| XXYL1       | 3                         |

### Supplementary References:

1. Landgraf, P. et al. A mammalian microRNA expression atlas based on small RNA library sequencing. *Cell* **129**, 1401-1414 (2007).
2. Zhang, F. et al. Efficient construction of sequence-specific TAL effectors for modulating mammalian transcription. *Nat Biotechnol* **29**, 149-153 (2011).
3. Cermak, T. et al. Efficient design and assembly of custom TALEN and other TAL effector-based constructs for DNA targeting. *Nucleic Acids Res* **39**, e82 (2011).
